# Supplementary material for: NEDD9, an independent good prognostic factor in intermediate-risk acute myeloid leukemia patients
Source: PubMed Central journal article supplement (PMC5652681; doi:10.18632/oncotarget.18537), 2017-06-16
Supplement: oncotarget-08-76003-s001.pdf [file oncotarget-08-76003-s001.pdf]

## **NEDD9, an independent good prognostic factor in intermediate-risk acute myeloid leukemia patients**

### **SUPPLEMENTARY MATERIALS**

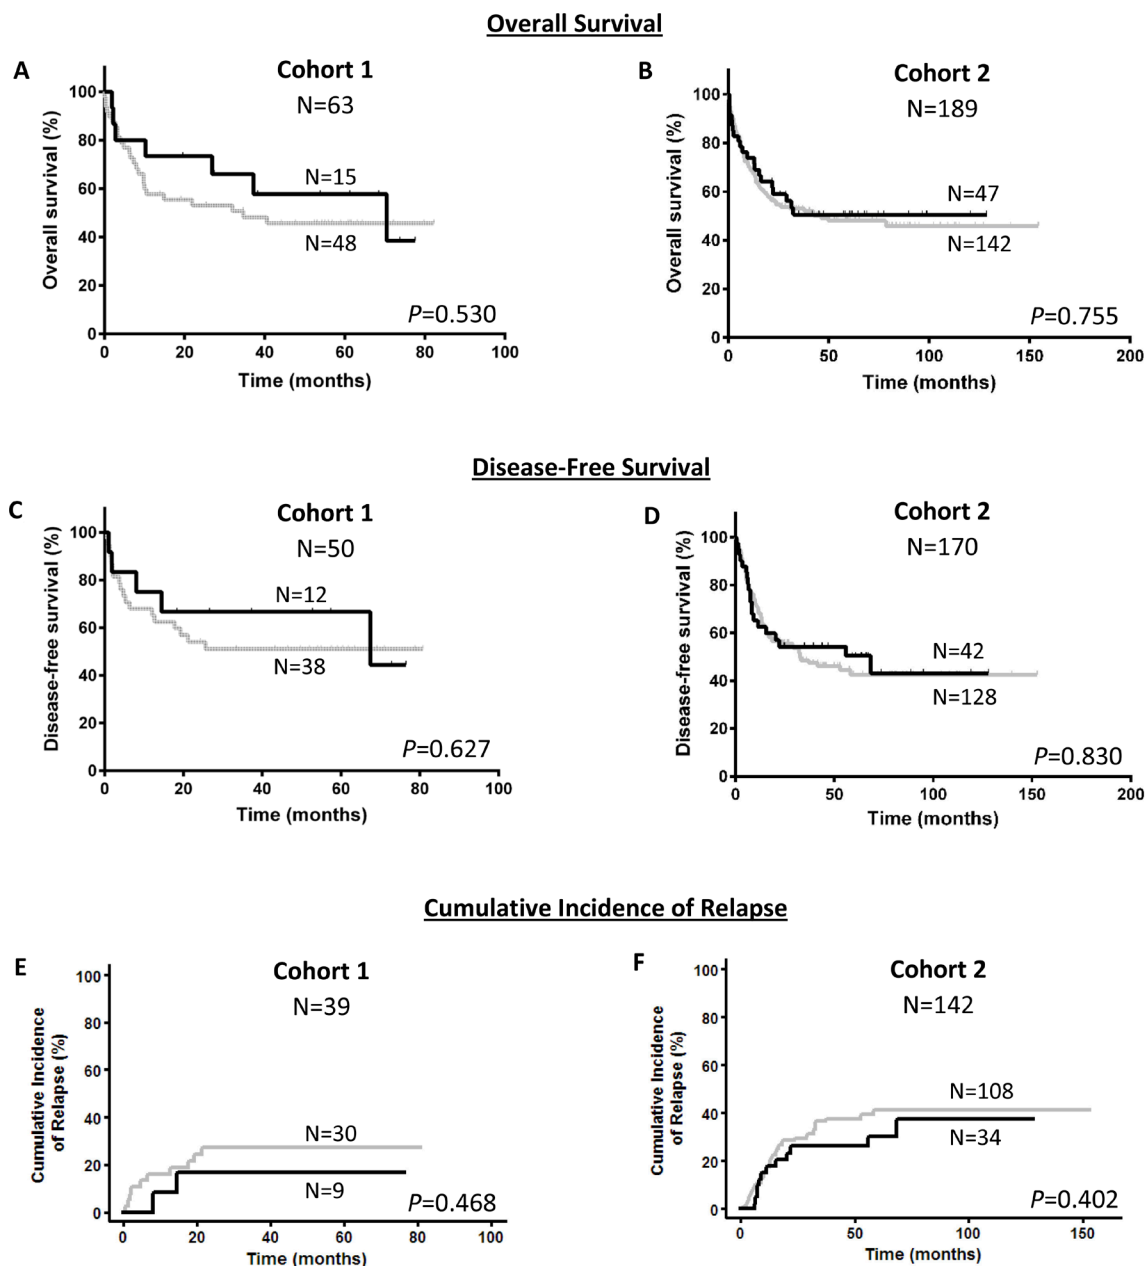

**Supplementary Figure 1: OS, DFS and CIR according to *BCAR1* expression in both cohorts.** Survival and cumulative incidence of relapse according to *BCAR1* expression in cohorts. Kaplan–Meier curves represent OS of cohort 1 (**A**) and cohort 2 (**B**), DFS of cohort 1 (**C**) and cohort 2 (**D**), CIR of cohort 1 (**E**) and cohort 2 (**F**), depending on the *BCAR1* expression. Black line and gray line indicate *BCAR1* overexpressed and underexpressed, respectively. Log-rank test for OS and DFS and Gray test for CIR were used to analyze the statistical significance.  $P < 0.05$  was considered statistically significant (Bold values). OS; Overall survival. DFS; Disease-free survival. CIR; Cumulative incidence of relapse.

**Supplementary Table 1: Time-dependent endpoints analyses regarding clinical characteristics of the cohorts of our study**

|                                                    | OS                   |                       | DFS                  |                       | CIR                  |                       |
|----------------------------------------------------|----------------------|-----------------------|----------------------|-----------------------|----------------------|-----------------------|
|                                                    | Cohort 1<br>(n = 73) | Cohort 2<br>(n = 206) | Cohort 1<br>(n = 59) | Cohort 2<br>(n = 185) | Cohort 1<br>(n = 59) | Cohort 2<br>(n = 185) |
| Median of follow-up in months                      |                      |                       |                      |                       |                      |                       |
| Alive (Range)                                      | 56 (3–82)            | 58 (1.7–154)          |                      |                       |                      |                       |
| Alive and CR patients (Range)                      |                      |                       | 54 (2–81)            | 46 (0.1–153)          | 54 (2–81)            | 46 (0.1–153)          |
| Survival, RR or CIR at 5 years                     |                      |                       |                      |                       |                      |                       |
| (%)                                                | 47.0 ± 6.1           | 48.8 ± 3.7            | 51.4 ± 6.6           | 44.8 ± 4.1            | 29.6 ± 6.1           | 37.8 ± 3.9            |
| Patient status                                     |                      |                       |                      |                       |                      |                       |
| Alive (%)                                          | 35 (48)              | 105 (51)              | 32 (54)              | 105 (57)              | 32 (54)              | 105 (57)              |
| Death (%)                                          | 38 (52)              | 101 (49)              | 27 (46)              | 80 (43)               | 27 (46)              | 80 (43)               |
| Relapsed (%)                                       | 17 (23)              | 64 (31)               | 17 (29)              | 64 (35)               | 17 (29)              | 64 (35)               |
| Age, median (%)                                    | <b>P = 0.028</b>     | <b>P = 0.007</b>      |                      | <b>P = 0.037</b>      |                      |                       |
| < 50 years                                         | 57.3 ± 8.7           | 58.7 ± 5.6            | NS                   | 52.6 ± 6.0            | NS                   | NS                    |
| > 50 years                                         | 25.6 ± 11.8          | 38.1 ± 5.5            | NS                   | 32.1 ± 6.1            | NS                   | NS                    |
| FLT3 duplication (%)                               |                      |                       |                      | P = 0.024             |                      |                       |
| FLT3/ITD <sup>-</sup>                              | NS                   | NS                    | NS                   | 45.2 ± 5.3            | NS                   | NS                    |
| FLT3/ITD <sup>+</sup>                              | NS                   | NS                    | NS                   | 32.9 ± 7.2            | NS                   | NS                    |
| FLT3/NPM1 Combination (%)                          |                      | <b>P = 0.002</b>      |                      | <b>P = 0.001</b>      |                      | <b>P = 0.018</b>      |
| FLT3 <sup>-</sup> + NPM1 <sup>+</sup> (Favourable) | NS                   | 64.1 ± 8.2            | NS                   | 54.0 ± 9.0            | NS                   | 43.1 ± 4.9            |
| Others (Unfavourable)                              | NS                   | 40.3 ± 4.3            | NS                   | 36.6 ± 4.7            | NS                   | 35.1 ± 9.1            |

The results for the median follow-up are presented as the number of patients (range) for each condition; for the patient status as the number of patients (%); and for all the others as the estimates in percentage ± the standard error. Log-rank test was used to analyze the statistical significance for each variable. *P* < 0.05 was considered statistically significant (Bold values). NS represents not significant differences, and the estimates were not included in the table. CR; Complete remission. OS; Overall survival. DFS; Disease-free survival. CIR; Cumulative incidence of relapse.
